# Supplementary material
Source: PubMed Central journal article supplement (PMC4446235)
Supplement: NIHMS670587-supplement-01.pdf [file NIHMS670587-supplement-01.pdf]

## SUPPLEMENTAL TABLE 1

### Implicated Agents in 899 Subjects with Definite, Highly Likely, or Probably DILI

|     | PRIMARY IMPLICATED AGENT        | Total<br>N=899<br>n (%) | Cumulative<br>n(%) |
|-----|---------------------------------|-------------------------|--------------------|
| 1.  | HERBAL& DIETARY SUPPLEMENTS     | 145 (16.1%)             | 145 (16.1%)        |
| 2.  | AMOXICILLIN W/CLAVULANIC ACID   | 91 (10.1%)              | 236 (26.3%)        |
| 3.  | ISONIAZID                       | 48 (5.3%)               | 284 (31.6%)        |
| 4.  | NITROFURANTOIN                  | 42 (4.7%)               | 326 (36.3%)        |
| 5.  | SULFAMETHOXAZOLE W/TRIMETHOPRIM | 31 (3.4%)               | 357 (39.7%)        |
| 6.  | MINOCYCLINE                     | 28 (3.1%)               | 385 (42.8%)        |
| 7.  | CEFAZOLIN                       | 20 (2.2%)               | 405 (45.1%)        |
| 8.  | AZITHROMYCIN                    | 18 (2.0%)               | 423 (47.1%)        |
| 9.  | CIPROFLOXACIN                   | 16 (1.8%)               | 439 (48.8%)        |
| 10. | LEVOFLOXACIN                    | 13 (1.4%)               | 452 (50.3%)        |
| 11. | DICLOFENAC                      | 12 (1.3%)               | 464 (51.6%)        |
| 12. | PHENYTOIN                       | 12 (1.3%)               | 476 (52.9%)        |
| 13. | METHYLDOPA                      | 11 (1.2%)               | 487 (54.2%)        |
| 14. | AZATHIOPRINE                    | 10 (1.1%)               | 497 (55.3%)        |
| 15. | HYDRALAZINE                     | 9 (1.0%)                | 506 (56.3%)        |
| 16. | LAMOTRIGINE                     | 9 (1.0%)                | 515 (57.3%)        |
| 17. | MERCAPTOPYRINE                  | 9 (1.0%)                | 524 (58.3%)        |
| 18. | ATORVASTATIN                    | 8 (0.9%)                | 532 (59.2%)        |
| 19. | MOXIFLOXACIN                    | 8 (0.9%)                | 540 (60.1%)        |
| 20. | ALLOPURINOL                     | 7 (0.8%)                | 547 (60.8%)        |
| 21. | DULOXETINE                      | 7 (0.8%)                | 554 (61.6%)        |
| 22. | ROSUVASTATIN                    | 7 (0.8%)                | 561 (62.4%)        |
| 23. | TELITHROMYCIN                   | 7 (0.8%)                | 568 (63.2%)        |
| 24. | TERBINAFINE                     | 7 (0.8%)                | 575 (64.0%)        |

|     | <b>PRIMARY IMPLICATED AGENT</b>  | <b>Total<br/>N=899<br/>n (%)</b> | <b>Cumulative<br/>n(%)</b> |
|-----|----------------------------------|----------------------------------|----------------------------|
| 25. | VALPROIC ACID                    | 7 (0.8%)                         | 582 (64.7%)                |
| 26. | AMOXICILLIN                      | 6 (0.7%)                         | 588 (65.4%)                |
| 27. | INTERFERON BETA-1A               | 6 (0.7%)                         | 594 (66.1%)                |
| 28. | SIMVASTATIN                      | 6 (0.7%)                         | 600 (66.7%)                |
| 29. | AMIODARONE                       | 5 (0.6%)                         | 605 (67.3%)                |
| 30. | BUPROPION                        | 5 (0.6%)                         | 610 (67.9%)                |
| 31. | IMATINIB                         | 5 (0.6%)                         | 615 (68.4%)                |
| 32. | LEFLUNOMIDE                      | 5 (0.6%)                         | 620 (69.0%)                |
| 33. | LISINOPRIL                       | 5 (0.6%)                         | 625 (69.5%)                |
| 34. | NICOTINIC ACID                   | 5 (0.6%)                         | 630 (70.1%)                |
| 35. | PIPERACILLIN SODIUM W/TAZOBACTAM | 5 (0.6%)                         | 635 (70.6%)                |
| 36. | ATOMOXETINE                      | 4 (0.4%)                         | 639 (71.1%)                |
| 37. | CARBAMAZEPINE                    | 4 (0.4%)                         | 643 (71.5%)                |
| 38. | CEFTRIAZONE                      | 4 (0.4%)                         | 647 (72.0%)                |
| 39. | DISULFIRAM                       | 4 (0.4%)                         | 651 (72.4%)                |
| 40. | DOXYCYCLINE                      | 4 (0.4%)                         | 655 (72.9%)                |
| 41. | FENOFIBRATE                      | 4 (0.4%)                         | 659 (73.3%)                |
| 42. | FLAVOCOXID                       | 4 (0.4%)                         | 663 (73.7%)                |
| 43. | FLUCONAZOLE                      | 4 (0.4%)                         | 667 (74.2%)                |
| 44. | MONTELUKAST                      | 4 (0.4%)                         | 671 (74.6%)                |
| 45. | OXALIPLATIN                      | 4 (0.4%)                         | 675 (75.1%)                |
| 46. | PRAVASTATIN                      | 4 (0.4%)                         | 679 (75.5%)                |
| 47. | TAMOXIFEN                        | 4 (0.4%)                         | 683 (76.0%)                |
| 48. | TEMOZOLOMIDE                     | 4 (0.4%)                         | 687 (76.4%)                |
| 49. | ACITRETIN                        | 3 (0.3%)                         | 690 (76.8%)                |
| 50. | CEFALEXIN                        | 3 (0.3%)                         | 693 (77.1%)                |
| 51. | CELECOXIB                        | 3 (0.3%)                         | 696 (77.4%)                |

|     | <b>PRIMARY IMPLICATED AGENT</b> | <b>Total<br/>N=899<br/>n (%)</b> | <b>Cumulative<br/>n(%)</b> |
|-----|---------------------------------|----------------------------------|----------------------------|
| 52. | DARUNAVIR                       | 3 (0.3%)                         | 699 (77.8%)                |
| 53. | DICLOFENAC SODIUM W/MISOPROSTOL | 3 (0.3%)                         | 702 (78.1%)                |
| 54. | ESCITALOPRAM                    | 3 (0.3%)                         | 705 (78.4%)                |
| 55. | GABAPENTIN                      | 3 (0.3%)                         | 708 (78.8%)                |
| 56. | INFLIXIMAB                      | 3 (0.3%)                         | 711 (79.1%)                |
| 57. | MELOXICAM                       | 3 (0.3%)                         | 714 (79.4%)                |
| 58. | METFORMIN                       | 3 (0.3%)                         | 717 (79.8%)                |
| 59. | METHOTREXATE                    | 3 (0.3%)                         | 720 (80.1%)                |
| 60. | OXACILLIN                       | 3 (0.3%)                         | 723 (80.4%)                |
| 61. | PROPYLTHIOURACIL                | 3 (0.3%)                         | 726 (80.8%)                |
| 62. | QUETIAPINE                      | 3 (0.3%)                         | 729 (81.1%)                |
| 63. | RANITIDINE                      | 3 (0.3%)                         | 732 (81.4%)                |
| 64. | SULFASALAZINE                   | 3 (0.3%)                         | 735 (81.8%)                |
| 65. | THIAMAZOLE                      | 3 (0.3%)                         | 738 (82.1%)                |
| 66. | VANCOMYCIN                      | 3 (0.3%)                         | 741 (82.4%)                |
| 67. | VERAPAMIL                       | 3 (0.3%)                         | 744 (82.8%)                |
| 68. | ASPARAGINASE                    | 2 (0.2%)                         | 746 (83.0%)                |
| 69. | ATRIPLA                         | 2 (0.2%)                         | 748 (83.2%)                |
| 70. | CEFADROXIL                      | 2 (0.2%)                         | 750 (83.4%)                |
| 71. | CEFUROXIME                      | 2 (0.2%)                         | 752 (83.6%)                |
| 72. | CLARITHROMYCIN                  | 2 (0.2%)                         | 754 (83.9%)                |
| 73. | CLINDAMYCIN                     | 2 (0.2%)                         | 756 (84.1%)                |
| 74. | CYCLOPHOSPHAMIDE                | 2 (0.2%)                         | 758 (84.3%)                |
| 75. | DANTROLENE                      | 2 (0.2%)                         | 760 (84.5%)                |
| 76. | DAPSONE                         | 2 (0.2%)                         | 762 (84.8%)                |
| 77. | DAPTOMYCIN                      | 2 (0.2%)                         | 764 (85.0%)                |
| 78. | DRONEDARONE                     | 2 (0.2%)                         | 766 (85.2%)                |

|      | <b>PRIMARY IMPLICATED AGENT</b> | <b>Total<br/>N=899<br/>n (%)</b> | <b>Cumulative<br/>n(%)</b> |
|------|---------------------------------|----------------------------------|----------------------------|
| 79.  | DROSPIRENONE W/ETHINYLESTRADIOL | 2 (0.2%)                         | 768 (85.4%)                |
| 80.  | ERYTHROMYCIN                    | 2 (0.2%)                         | 770 (85.7%)                |
| 81.  | ETANERCEPT                      | 2 (0.2%)                         | 772 (85.9%)                |
| 82.  | ETODOLAC                        | 2 (0.2%)                         | 774 (86.1%)                |
| 83.  | EXEMESTANE                      | 2 (0.2%)                         | 776 (86.3%)                |
| 84.  | EZETIMIBE W/SIMVASTATIN         | 2 (0.2%)                         | 778 (86.5%)                |
| 85.  | FLUVASTATIN                     | 2 (0.2%)                         | 780 (86.8%)                |
| 86.  | INVESTIGATIONAL DRUG            | 2 (0.2%)                         | 782 (87.0%)                |
| 87.  | ISOFLURANE                      | 2 (0.2%)                         | 784 (87.2%)                |
| 88.  | LAPATINIB                       | 2 (0.2%)                         | 786 (87.4%)                |
| 89.  | LOVASTATIN                      | 2 (0.2%)                         | 788 (87.7%)                |
| 90.  | METHYLPREDNISOLONE              | 2 (0.2%)                         | 790 (87.9%)                |
| 91.  | NEVIRAPINE                      | 2 (0.2%)                         | 792 (88.1%)                |
| 92.  | OLANZAPINE                      | 2 (0.2%)                         | 794 (88.3%)                |
| 93.  | OXAPROZIN                       | 2 (0.2%)                         | 796 (88.5%)                |
| 94.  | PEGASPARGASE                    | 2 (0.2%)                         | 798 (88.8%)                |
| 95.  | PYRAZINAMIDE                    | 2 (0.2%)                         | 800 (89.0%)                |
| 96.  | RIFAMPICIN                      | 2 (0.2%)                         | 802 (89.2%)                |
| 97.  | SEVOFLURANE                     | 2 (0.2%)                         | 804 (89.4%)                |
| 98.  | TOPIRAMATE                      | 2 (0.2%)                         | 806 (89.7%)                |
| 99.  | VALACICLOVIR                    | 2 (0.2%)                         | 808 (89.9%)                |
| 100. | ACICLOVIR                       | 1 (0.1%)                         | 809 (90.0%)                |
| 101. | ADALIMUMAB                      | 1 (0.1%)                         | 810 (90.1%)                |
| 102. | ALFUZOSIN                       | 1 (0.1%)                         | 811 (90.2%)                |
| 103. | ALISKIREN                       | 1 (0.1%)                         | 812 (90.3%)                |
| 104. | AMLODIPINE                      | 1 (0.1%)                         | 813 (90.4%)                |
| 105. | ANTITHYMOCYTE IMMUNOGLOBULIN    | 1 (0.1%)                         | 814 (90.5%)                |

|      | <b>PRIMARY IMPLICATED AGENT</b>   | <b>Total<br/>N=899<br/>n (%)</b> | <b>Cumulative<br/>n(%)</b> |
|------|-----------------------------------|----------------------------------|----------------------------|
| 106. | ATAZANAVIR                        | 1 (0.1%)                         | 815 (90.7%)                |
| 107. | ATENOLOL                          | 1 (0.1%)                         | 816 (90.8%)                |
| 108. | BACLOFEN                          | 1 (0.1%)                         | 817 (90.9%)                |
| 109. | BENZAEPRIIL                       | 1 (0.1%)                         | 818 (91.0%)                |
| 110. | BENZATHINE BENZYL PENICILLIN      | 1 (0.1%)                         | 819 (91.1%)                |
| 111. | BENZONATATE                       | 1 (0.1%)                         | 820 (91.2%)                |
| 112. | BICALUTAMIDE                      | 1 (0.1%)                         | 821 (91.3%)                |
| 113. | BOSENTAN                          | 1 (0.1%)                         | 822 (91.4%)                |
| 114. | CARBOPLATIN                       | 1 (0.1%)                         | 823 (91.5%)                |
| 115. | CARVEDILOL                        | 1 (0.1%)                         | 824 (91.7%)                |
| 116. | CEDIRANIB                         | 1 (0.1%)                         | 825 (91.8%)                |
| 117. | CEFACLOR                          | 1 (0.1%)                         | 826 (91.9%)                |
| 118. | CEFDINIR                          | 1 (0.1%)                         | 827 (92.0%)                |
| 119. | CEFEPIME                          | 1 (0.1%)                         | 828 (92.1%)                |
| 120. | CEFOTAXIME                        | 1 (0.1%)                         | 829 (92.2%)                |
| 121. | DALTEPARIN                        | 1 (0.1%)                         | 830 (92.3%)                |
| 122. | DEFERASIROX                       | 1 (0.1%)                         | 831 (92.4%)                |
| 123. | DEXMETHYLPHENIDATE                | 1 (0.1%)                         | 832 (92.5%)                |
| 124. | DIDANOSINE                        | 1 (0.1%)                         | 833 (92.7%)                |
| 125. | DOCETAXEL                         | 1 (0.1%)                         | 834 (92.8%)                |
| 126. | ENALAPRIL                         | 1 (0.1%)                         | 835 (92.9%)                |
| 127. | ESOMEPRAZOLE                      | 1 (0.1%)                         | 836 (93.0%)                |
| 128. | ESTRADIOL                         | 1 (0.1%)                         | 837 (93.1%)                |
| 129. | ETHAMBUTOL                        | 1 (0.1%)                         | 838 (93.2%)                |
| 130. | ETHINYLESTRADIOL W/LEVONORGESTREL | 1 (0.1%)                         | 839 (93.3%)                |
| 131. | ETHINYLESTRADIOL W/NORGESTIMATE   | 1 (0.1%)                         | 840 (93.4%)                |
| 132. | ETHOSUXIMIDE                      | 1 (0.1%)                         | 841 (93.5%)                |

|      | <b>PRIMARY IMPLICATED AGENT</b>  | <b>Total<br/>N=899<br/>n (%)</b> | <b>Cumulative<br/>n(%)</b> |
|------|----------------------------------|----------------------------------|----------------------------|
| 133. | ETRAVIRINE                       | 1 (0.1%)                         | 842 (93.7%)                |
| 134. | FEBUXOSTAT                       | 1 (0.1%)                         | 843 (93.8%)                |
| 135. | FLUOXETINE                       | 1 (0.1%)                         | 844 (93.9%)                |
| 136. | FOSPHENYTOIN                     | 1 (0.1%)                         | 845 (94.0%)                |
| 137. | GATIFLOXACIN                     | 1 (0.1%)                         | 846 (94.1%)                |
| 138. | GEMFIBROZIL                      | 1 (0.1%)                         | 847 (94.2%)                |
| 139. | GLIBENCLAMIDE                    | 1 (0.1%)                         | 848 (94.3%)                |
| 140. | IBUPROFEN                        | 1 (0.1%)                         | 849 (94.4%)                |
| 141. | IMETELSTAT                       | 1 (0.1%)                         | 850 (94.5%)                |
| 142. | IMIPRAMINE                       | 1 (0.1%)                         | 851 (94.7%)                |
| 143. | INTERFERON BETA-1B               | 1 (0.1%)                         | 852 (94.8%)                |
| 144. | INTERFERONS                      | 1 (0.1%)                         | 853 (94.9%)                |
| 145. | INTERLEUKINS                     | 1 (0.1%)                         | 854 (95.0%)                |
| 146. | IPILIMUMAB                       | 1 (0.1%)                         | 855 (95.1%)                |
| 147. | IRBESARTAN                       | 1 (0.1%)                         | 856 (95.2%)                |
| 148. | ISONIAZID W/RIFAMPICIN           | 1 (0.1%)                         | 857 (95.3%)                |
| 149. | KETAMINE                         | 1 (0.1%)                         | 858 (95.4%)                |
| 150. | KETOCONAZOLE                     | 1 (0.1%)                         | 859 (95.6%)                |
| 151. | LABETALOL                        | 1 (0.1%)                         | 860 (95.7%)                |
| 152. | LANSOPRAZOLE                     | 1 (0.1%)                         | 861 (95.8%)                |
| 153. | LETROZOLE                        | 1 (0.1%)                         | 862 (95.9%)                |
| 154. | LISINOPRIL W/HYDROCHLOROTHIAZIDE | 1 (0.1%)                         | 863 (96.0%)                |
| 155. | LOPINAVIR W/RITONAVIR            | 1 (0.1%)                         | 864 (96.1%)                |
| 156. | LOSARTAN                         | 1 (0.1%)                         | 865 (96.2%)                |
| 157. | MEROPENEM                        | 1 (0.1%)                         | 866 (96.3%)                |
| 158. | MESALAZINE                       | 1 (0.1%)                         | 867 (96.4%)                |
| 159. | METAXALONE                       | 1 (0.1%)                         | 868 (96.6%)                |

|      | <b>PRIMARY IMPLICATED AGENT</b> | <b>Total<br/>N=899<br/>n (%)</b> | <b>Cumulative<br/>n(%)</b> |
|------|---------------------------------|----------------------------------|----------------------------|
| 160. | METHYLPHENIDATE                 | 1 (0.1%)                         | 869 (96.7%)                |
| 161. | METOCLOPRAMIDE                  | 1 (0.1%)                         | 870 (96.8%)                |
| 162. | METOPROLOL                      | 1 (0.1%)                         | 871 (96.9%)                |
| 163. | MICAFUNGIN                      | 1 (0.1%)                         | 872 (97.0%)                |
| 164. | MODAFINIL                       | 1 (0.1%)                         | 873 (97.1%)                |
| 165. | NEFAZODONE                      | 1 (0.1%)                         | 874 (97.2%)                |
| 166. | NELFINAVIR                      | 1 (0.1%)                         | 875 (97.3%)                |
| 167. | OCTREOTIDE                      | 1 (0.1%)                         | 876 (97.4%)                |
| 168. | OMEPRAZOLE                      | 1 (0.1%)                         | 877 (97.6%)                |
| 169. | PENICILLAMINE                   | 1 (0.1%)                         | 878 (97.7%)                |
| 170. | PHENTERMINE                     | 1 (0.1%)                         | 879 (97.8%)                |
| 171. | PRASUGREL                       | 1 (0.1%)                         | 880 (97.9%)                |
| 172. | PREGABALIN                      | 1 (0.1%)                         | 881 (98.0%)                |
| 173. | PROMETHAZINE                    | 1 (0.1%)                         | 882 (98.1%)                |
| 174. | REGORAFENIB                     | 1 (0.1%)                         | 883 (98.2%)                |
| 175. | SALSALATE                       | 1 (0.1%)                         | 884 (98.3%)                |
| 176. | SERTRALINE                      | 1 (0.1%)                         | 885 (98.4%)                |
| 177. | SITAGLIPTIN                     | 1 (0.1%)                         | 886 (98.6%)                |
| 178. | SULFADIAZINE                    | 1 (0.1%)                         | 887 (98.7%)                |
| 179. | SULINDAC                        | 1 (0.1%)                         | 888 (98.8%)                |
| 180. | TACROLIMUS                      | 1 (0.1%)                         | 889 (98.9%)                |
| 181. | TESTOSTERONE                    | 1 (0.1%)                         | 890 (99.0%)                |
| 182. | THALIDOMIDE                     | 1 (0.1%)                         | 891 (99.1%)                |
| 183. | TIZANIDINE                      | 1 (0.1%)                         | 892 (99.2%)                |
| 184. | TRAZODONE                       | 1 (0.1%)                         | 893 (99.3%)                |
| 185. | VALDECOXIB                      | 1 (0.1%)                         | 894 (99.4%)                |
| 186. | VALSARTAN                       | 1 (0.1%)                         | 895 (99.6%)                |

|      | <b>PRIMARY IMPLICATED AGENT</b> | <b>Total<br/>N=899<br/>n (%)</b> | <b>Cumulative<br/>n(%)</b> |
|------|---------------------------------|----------------------------------|----------------------------|
| 187. | VINCRIStINE                     | 1 (0.1%)                         | 896 (99.7%)                |
| 188. | VORICONAZOLE                    | 1 (0.1%)                         | 897 (99.8%)                |
| 189. | ZIDOVUDINE W/LAMIVUDINE         | 1 (0.1%)                         | 898 (99.9%)                |
| 190. | ZOLEDRONIC ACID                 | 1 (0.1%)                         | 899 (100.0%)               |



**Supplemental Table 2: Selected characteristics of DILI due to top 10 single prescription agents**

|                                                                                          | <b>Amox-Clav<br/>(n=91)</b> | <b>Isoniazid<br/>(n=48)</b> | <b>Nitrofurantoin<br/>(n=42)</b> | <b>TMP-SMZ<br/>(n=31)</b> | <b>Minocycline<br/>(n=28)</b> | <b>Cefazolin<br/>(n=20)</b> | <b>Azithromycin<br/>(n=18)</b> | <b>Ciprofloxacin<br/>(n=16)</b> | <b>Levofloxacin<br/>(n=13)</b> | <b>Diclofenac<br/>(n=12)</b> |
|------------------------------------------------------------------------------------------|-----------------------------|-----------------------------|----------------------------------|---------------------------|-------------------------------|-----------------------------|--------------------------------|---------------------------------|--------------------------------|------------------------------|
| Age (years, mean ± SD)                                                                   | 60± 13                      | 46 ±15                      | 64± 12                           | 44± 16                    | 28± 15                        | 52± 16                      | 40± 21                         | 51± 15                          | 49± 15                         | 50± 15                       |
| Females (%)                                                                              | 41                          | 67                          | 100                              | 45                        | 71                            | 50                          | 72                             | 88                              | 54                             | 83                           |
| Latency (days in median , IQR)                                                           | 29<br>(18-39)               | 78<br>(53-121)              | 492<br>(50-904)                  | 21<br>(14-32)             | 351<br>(99-570)               | 22<br>(16-25)               | 17.5<br>(10-25)                | 22.5<br>(8.5-39)                | 10<br>(8-31)                   | 36<br>(26-105)               |
| <b>Pattern of liver injury</b><br>HC/Chol/Mixed (%)                                      | 24/33/43                    | 85/2/12.5                   | 62/12/26                         | 35.5/39/26                | 79/11/11                      | 25/45/30                    | 61/28/11                       | 37.5/31/31                      | 46/31/23                       | 100/0/0                      |
| <b>Liver Biochemistries – Peak values</b>                                                |                             |                             |                                  |                           |                               |                             |                                |                                 |                                |                              |
| ALT (U/L, mean± SD)                                                                      | 545± 499                    | 1416± 1030                  | 932± 847                         | 685± 558                  | 1465± 1024                    | 471± 284                    | 2239± 3857                     | 808± 648                        | 599± 615                       | 1266± 680                    |
| AP (U/L, mean± SD)                                                                       | 466± 291                    | 262± 144                    | 278± 188                         | 495± 467                  | 210± 171                      | 529± 369                    | 429± 351                       | 559± 590                        | 700± 789                       | 222±                         |
| Total bilirubin (mg/dL, mean± sd)                                                        | 15.6±10.8                   | 11.9±11.3                   | 8.7± 9.6                         | 13.7± 12.5                | 6.5± 6.7                      | 9.2± 4.7                    | 11± 7.7                        | 9.8± 11                         | 8.5± 6.85                      | 100<br>18± 17                |
| Hy's law (%)                                                                             | 27                          | 43                          | 19                               | 21                        | 32                            | 10                          | 62.5                           | 20                              | 23                             | 42                           |
| Peripheral eosinophilia (>500/μL) (%)                                                    | 15                          | 0                           | 5                                | 31                        | 6                             | 30                          | 20                             | 33                              | 0                              | 0                            |
| ANA >1:80 (%)                                                                            | 17                          | 19                          | 52                               | 13                        | 57                            | 10                          | 17                             | 31                              | 15                             | 17                           |
| <b>Improvement in liver tests –median days,</b>                                          |                             |                             |                                  |                           |                               |                             |                                |                                 |                                |                              |
| Peak ALT to below ULN                                                                    | 63                          | 74                          | 97                               | 78                        | 83                            | 53                          | 77                             | 190                             | 87                             | 70                           |
| Peak AP to below ULN                                                                     | 74                          | 35.5                        | 119                              | 98                        | 42                            | 49                          | 139                            | 189                             | 261                            | 105                          |
| Peak bilirubin to ≤ 1 mg/dL                                                              | 87                          | 67                          | 80                               | 97                        | 49                            | 56                          | 63                             | 51                              | 91                             | 104                          |
| <b>Causality Assessment</b><br>Definite/ Very likely/ Probable<br>(% of total in column) | 56/41/3                     | 63/29/8                     | 17/67/17                         | 29/52/19                  | 25/61/14                      | 10/75/15                    | 6/56/39                        | 19/44/36                        | 0/85/15                        | 33/50/17                     |
| <b>Severity of Liver Injury</b>                                                          |                             |                             |                                  |                           |                               |                             |                                |                                 |                                |                              |
| Mild                                                                                     | 7                           | 25                          | 45                               | 16                        | 43                            | 10                          | 11                             | 31                              | 31                             | 42                           |
| Moderate                                                                                 | 49                          | 10                          | 7                                | 19                        | 29                            | 30                          | 17                             | 13                              | 8                              | 0                            |

|                                 |    |     |    |     |    |    |    |    |     |    |
|---------------------------------|----|-----|----|-----|----|----|----|----|-----|----|
| Moderate-hospitalized           | 40 | 27  | 14 | 35  | 18 | 50 | 33 | 31 | 31  | 0  |
| Severe                          | 3  | 19  | 24 | 26  | 11 | 10 | 28 | 13 | 23  | 50 |
| Fatal<br>(% of total in column) | 1  | 19  | 9  | 3   | 0  | 0  | 11 | 13 | 7.7 | 8  |
| Death, at any time point (%)    | 1  | 2.1 | 9  | 3   | 0  | 0  | 6  | 19 | 8   | 8  |
| -Percent Liver –related         | 0  | 100 | 75 | 100 |    |    | 50 | 67 | 100 | 0  |
| Liver Transplantation (%)       | 1  | 17  | 5  | 0   | 0  | 0  | 11 | 0  | 0   | 0  |
| Chronic DILI (%)                | 7  | 8   | 24 | 26  | 19 | 16 | 20 | 18 | 11  | 0  |

**Abbreviations used:** Amox-Clav, amoxicillin-clavulanate; TMP-SMZ, Trimethoprim/sulfamethoxazole; ALT, serum alanine aminotransferase; AP, serum alkaline phosphatase; BMI, body mass index; Chol, Cholestatic; DILI, drug-induced liver injury; HC, hepatocellular; INR, international normalized ratio; IQR, interquartile range (25-75%); SD, standard deviation; ULN, upper limit of normal

**Supplemental Table 3: Agents implicated in 89 individuals with underlying chronic liver disease**

|    | Overall causality score | Primarily implicated agent | Causality score for the primary implicated agent | Second Implicated agent | Causality score for the second implicated agent | Third Implicated agent | Causality score for the Third implicated agent |
|----|-------------------------|----------------------------|--------------------------------------------------|-------------------------|-------------------------------------------------|------------------------|------------------------------------------------|
| 1  | Definite                | AMOX-CLAVULANATE           | Definite                                         |                         |                                                 |                        |                                                |
| 2  | Very likely             | AMOX-CLAVULANATE           | Very likely                                      | TELITHROMYCIN           | Unlikely                                        | LEVOFLOXACIN           | Unlikely                                       |
| 3  | Very likely             | AMOX-CLAVULANATE           | Very likely                                      |                         |                                                 |                        |                                                |
| 4  | Very likely             | AMOX-CLAVULANATE           | Very likely                                      |                         |                                                 |                        |                                                |
| 5  | Very likely             | ATORVASTATIN               | Very likely                                      |                         |                                                 |                        |                                                |
| 6  | Very likely             | ATRIPLA                    | Very likely                                      |                         |                                                 |                        |                                                |
| 7  | Very likely             | AZATHIOPRINE               | Very likely                                      |                         |                                                 |                        |                                                |
| 8  | Probable                | AZITHROMYCIN               | Probable                                         |                         |                                                 |                        |                                                |
| 9  | Probable                | AZITHROMYCIN               | Probable                                         |                         |                                                 |                        |                                                |
| 10 | Very likely             | AZITHROMYCIN               | Possible                                         | LEVOFLOXACIN            | Possible                                        |                        |                                                |
| 11 | Very likely             | AZITHROMYCIN               | Very likely                                      |                         |                                                 |                        |                                                |
| 12 | Very likely             | AZITHROMYCIN               | Very likely                                      |                         |                                                 |                        |                                                |
| 13 | Very likely             | AZITHROMYCIN               | Probable                                         | TMP-SMX                 | Possible                                        |                        |                                                |
| 14 | Probable                | CARBAMAZEPINE              | Probable                                         |                         |                                                 |                        |                                                |
| 15 | Probable                | CEFADROXIL                 | Probable                                         |                         |                                                 |                        |                                                |
| 16 | Probable                | CEFALEXIN                  | Probable                                         | TMP-SMX                 | Possible                                        |                        |                                                |
| 17 | Very likely             | CEFAZOLIN                  | Probable                                         | CREOSOTE                | Possible                                        | PROPOFOL               | Unlikely                                       |
| 18 | Probable                | CEFOTAXIME                 | Probable                                         |                         |                                                 |                        |                                                |
| 19 | Probable                | CIPROFLOXACIN              | Probable                                         |                         |                                                 |                        |                                                |
| 20 | Definite                | CIPROFLOXACIN              | Definite                                         |                         |                                                 |                        |                                                |
| 21 | Probable                | CIPROFLOXACIN              | Probable                                         |                         |                                                 |                        |                                                |

|    |             |                                                                                                 |             |             |          |           |          |
|----|-------------|-------------------------------------------------------------------------------------------------|-------------|-------------|----------|-----------|----------|
| 22 | Probable    | DARUNAVIR                                                                                       | Probable    | ETRAVIRINE  | Possible |           |          |
| 23 | Definite    | DEFERASIROX                                                                                     | Definite    |             |          |           |          |
| 24 | Probable    | DICLOFENAC                                                                                      | Probable    | METFORMIN   | Possible |           |          |
| 25 | Definite    | DISULFIRAM                                                                                      | Definite    |             |          |           |          |
| 26 | Very likely | DISULFIRAM                                                                                      | Very likely | LISINOPRIL  | Possible |           |          |
| 27 | Very likely | DULOXETINE                                                                                      | Very likely |             |          |           |          |
| 28 | Probable    | ERYTHROMYCIN                                                                                    | Probable    |             |          |           |          |
| 29 | Very likely | ESCITALOPRAM                                                                                    | Very likely |             |          |           |          |
| 30 | Probable    | EZETIMIBE<br>W/SIMVASTATIN                                                                      | Probable    |             |          |           |          |
| 31 | Very likely | FENOFIBRATE                                                                                     | Probable    | DOXAZOSIN   | Possible | EXENATIDE | Possible |
| 32 | Probable    | FLUCONAZOLE                                                                                     | Probable    |             |          |           |          |
| 33 | Very likely | GLIBENCLAMIDE                                                                                   | Probable    | DOXYCYCLINE | Possible |           |          |
| 34 | Probable    | HDS (Multiple CAM -<br>Nature's Way<br>Fenugreek; Maximum<br>Living Hyssop<br>Cleanse; Vinotol) | Probable    |             |          |           |          |
| 35 | Very likely | HDS (Black<br>Dragon)                                                                           | Very likely |             |          |           |          |
| 36 | Very likely | HDS (NO<br>Explode)                                                                             | Very likely |             |          |           |          |
| 37 | Definite    | HDS (Mass Tabs)                                                                                 | Definite    |             |          |           |          |
| 38 | Definite    | HDS (Beastrol)                                                                                  | Definite    |             |          |           |          |
| 39 | Very likely | HDS (Mega green tea)                                                                            | Very likely |             |          |           |          |
| 40 | Definite    | HDS (Hydroxycut)                                                                                | Definite    |             |          |           |          |
| 41 | Probable    | HDS (Slimquick)                                                                                 | Probable    |             |          |           |          |
| 42 | Very likely | HDS (The right<br>approach)                                                                     | Very likely |             |          |           |          |

|    |             |                                |             |                                         |                        |         |          |
|----|-------------|--------------------------------|-------------|-----------------------------------------|------------------------|---------|----------|
| 43 | Very likely | HDS (Mixture of Chinese herbs) | Very likely | SOMATROPIN                              | Possible               |         |          |
| 44 | Very likely | HDS (Mixture of Chinese herbs) | Very likely |                                         |                        |         |          |
| 45 | Definite    | HYDRALAZINE                    | Definite    |                                         |                        |         |          |
| 46 | Very likely | HYDRALAZINE                    | Possible    | TIGECYCLINE                             | Possible               | TMP-SMX | Possible |
| 47 | Very likely | INFLIXIMAB                     | Very likely |                                         |                        |         |          |
| 48 | Very likely | INTERFERON BETA-1A             | Very likely | TIZANIDINE                              | Possible               |         |          |
| 49 | Very likely | INTERFERONS                    | Very likely |                                         |                        |         |          |
| 50 | Probable    | ISONIAZID                      | Probable    | TMP-SMX                                 | Possible               |         |          |
| 51 | Probable    | ISONIAZID                      | Probable    |                                         |                        |         |          |
| 52 | Definite    | ISONIAZID                      | Definite    |                                         |                        |         |          |
| 53 | Very likely | ISONIAZID                      | Very likely |                                         |                        |         |          |
| 54 | Very likely | ISONIAZID                      | Very likely |                                         |                        |         |          |
| 55 | Definite    | ISONIAZID                      | Definite    |                                         |                        |         |          |
| 56 | Very likely | ISONIAZID W/RIFAMPICIN         | Very likely |                                         |                        |         |          |
| 57 | Very likely | LEFLUNOMIDE                    | Very likely |                                         |                        |         |          |
| 58 | Probable    | LEVOFLOXACIN                   | Probable    | CEFALEXIN                               | Possible               |         |          |
| 59 | Very likely | LEVOFLOXACIN                   | Very likely |                                         |                        |         |          |
| 60 | Very likely | LOPINAVIR W/RITONAVIR          | Very likely | ABACAVIR W/LAMIVUDINE                   | Unlikely Less than 25% |         |          |
| 61 | Probable    | MELOXICAM                      | Probable    |                                         |                        |         |          |
| 62 | Probable    | MERCAPTOPYRINE                 | Probable    |                                         |                        |         |          |
| 63 | Definite    | MERCAPTOPYRINE                 | Very likely | METRONIDAZOLE                           | Possible               |         |          |
| 64 | Very likely | METFORMIN                      | Very likely | GLIBENCLAMIDE W/METFORMIN HYDROCHLORIDE | Possible               |         |          |
| 65 | Very likely | METOCLOPRAMIDE                 | Very likely |                                         |                        |         |          |

|    |             |                                        |             |                                   |                           |             |          |
|----|-------------|----------------------------------------|-------------|-----------------------------------|---------------------------|-------------|----------|
| 66 | Probable    | MICAFUNGIN                             | Probable    |                                   |                           |             |          |
| 67 | Very likely | MINOCYCLINE                            | Very likely |                                   |                           |             |          |
| 68 | Probable    | MOXIFLOXACIN                           | Probable    | CIPROFLOXACIN                     | Possible                  |             |          |
| 69 | Definite    | NELFINAVIR                             | Very likely | ZIDOVUDINE<br>W/LAMIVUDINE        | Possible                  |             |          |
| 70 | Probable    | NEVIRAPINE                             | Probable    |                                   |                           |             |          |
| 71 | Probable    | NICOTINIC ACID                         | Probable    | CIPROFLOXACIN                     | Probable                  | NEOMYCIN    | Unlikely |
| 72 | Very likely | NITROFURANTOIN                         | Very likely |                                   |                           |             |          |
| 73 | Definite    | NITROFURANTOIN                         | Definite    |                                   |                           |             |          |
| 74 | Very likely | NITROFURANTOIN                         | Very likely |                                   |                           |             |          |
| 75 | Very likely | NITROFURANTOIN                         | Probable    | INTERFERON<br>BETA-1A             | Possible                  | PRAMIPEXOLE | Unlikely |
| 76 | Definite    | OXACILLIN                              | Definite    |                                   |                           |             |          |
| 77 | Definite    | OXAPROZIN                              | Definite    |                                   |                           |             |          |
| 78 | Probable    | PIPERACILLIN<br>SODIUM<br>W/TAZOBACTAM | Probable    |                                   |                           |             |          |
| 79 | Very likely | PROPYLTHIOURACIL                       | Very likely |                                   |                           |             |          |
| 80 | Very likely | RANITIDINE                             | Very likely |                                   |                           |             |          |
| 81 | Probable    | RIFAMPICIN                             | Probable    | ALBENDAZOLE                       | Possible                  |             |          |
| 82 | Very likely | SIMVASTATIN                            | Very likely | DICLOFENAC                        | Unlikely Less than<br>25% |             |          |
| 83 | Probable    | SULFASALAZINE                          | Probable    |                                   |                           |             |          |
| 84 | Very likely | TAMOXIFEN                              | Very likely |                                   |                           |             |          |
| 85 | Very likely | TEMOZOLOMIDE                           | Very likely |                                   |                           |             |          |
| 86 | Probable    | VALACICLOVIR                           | Possible    | LOVASTATIN<br>W/NICOTINIC<br>ACID | Possible                  |             |          |
| 87 | Probable    | VALPROIC ACID                          | Probable    |                                   |                           |             |          |
| 88 | Very likely | VINCRISTINE                            | Very likely | LOPINAVIR<br>W/RITONAVIR          | Possible                  |             |          |
| 89 | Probable    | ZIDOVUDINE<br>W/LAMIVUDINE             | Probable    | NELFINAVIR                        | Unlikely                  |             |          |

HDS: Herbal or Dietary Supplements
